# Supplementary material
Source: PubMed Central journal article supplement (PMC2838991)

Gastric Restriction Only  
(GR)

Gastric Banding

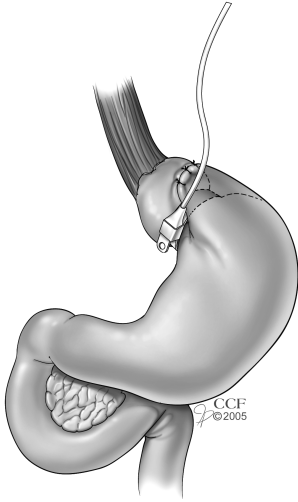

Sleeve Gastrectomy

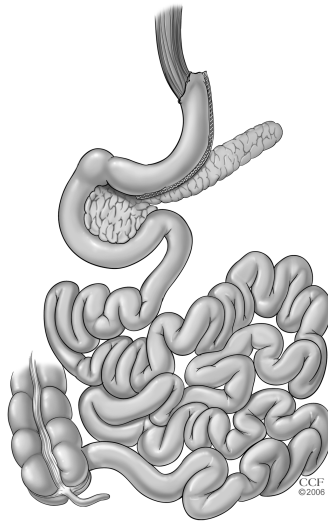

Gastric Restriction  
with Intestinal Bypass

RYGB

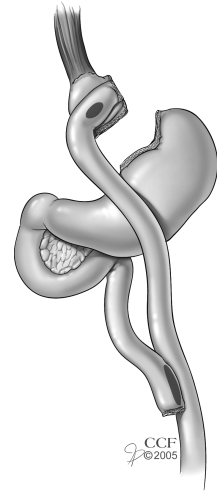

Supplement: NIHMS178760-supplement-supplement_figure.pdf [file NIHMS178760-supplement-supplement_figure.pdf]
